# Supplementary material
Source: PubMed Central journal article supplement (PMC11248427)
Supplement: 10-1055-a-1676-3852-2020-12-1316.pdf [file 10-1055-a-1676-3852-2020-12-1316.pdf]

**Tabelle 1**

## PICOS-Schema und Ableitung relevanter Suchbegriffe

| Parameter            | Definition                                                                                                                                                                                                                                                                                                                                 | Suchbegriffe                                                                                                      |
|----------------------|--------------------------------------------------------------------------------------------------------------------------------------------------------------------------------------------------------------------------------------------------------------------------------------------------------------------------------------------|-------------------------------------------------------------------------------------------------------------------|
| <b>Population</b>    | Hospitalisierte Kinder, Jugendliche und junge Erwachsene                                                                                                                                                                                                                                                                                   | Infant, child, adolescent, teenager, minor, baby, toddler                                                         |
| <b>Intervention</b>  | <i>Akteure:</i> CLS als psychosoziale Fachkräfte mit einer Spezialisierung im Bereich Kind und Kindesentwicklung.<br><i>Techniken:</i> Einzelne oder kombinierte Interventionen im Rahmen von CLS-Programmen, u.a. kognitiv-behaviorale Interventionen, Wissensvermittlung, Ablenkung, Vorbereitung, therapeutisches Spiel, Familienarbeit | Child Life Specialist, CLS, Certified Child Life Specialist, CCLS, Child Life Therapy, CLT                        |
| <b>Comparison</b>    | Treatment-As-Usual (Standardbehandlung), jegliche andere oder keine psychosoziale Intervention                                                                                                                                                                                                                                             |                                                                                                                   |
| <b>Outcomes</b>      | Mindestens einer der folgenden proximalen Outcome-Parameter: Angst, Stress, Schmerz.                                                                                                                                                                                                                                                       | Anxiety, fear, pain, stress                                                                                       |
| <b>Studiendesign</b> | Randomisierte kontrollierte Studien                                                                                                                                                                                                                                                                                                        | Randomised controlled trial, Randomised control trial, Randomized controlled trial, Randomized control trial, RCT |

*Anmerkungen.* Da für den Parameter „Comparison“ keine Spezifizierung erfolgte, wurden hier keine Suchbegriffe aufgenommen.

**Tabelle 2.** Suchstrategie für die Datenbanken Medline, Embase und PsycINFO (gesucht am 09.06.2020; aktualisiert am 02.02.2021)

| Ovid MEDLINE(R) |                                                                                                   |         |
|-----------------|---------------------------------------------------------------------------------------------------|---------|
| #               | Searches                                                                                          | Results |
| 1               | exp Infant/                                                                                       | 1154675 |
|                 | Infant*.tw                                                                                        | 372929  |
|                 | exp Child/                                                                                        | 1940693 |
|                 | child*.tw                                                                                         | 1258338 |
|                 | exp adolescent/                                                                                   | 2063074 |
|                 | adolescent*.tw                                                                                    | 221475  |
|                 | teen*.tw                                                                                          | 27348   |
|                 | minor*.tw                                                                                         | 263821  |
|                 | (baby or babies).tw                                                                               | 63676   |
|                 | toddler*.tw                                                                                       | 9621    |
|                 |                                                                                                   |         |
| 11              | (Child Life Specialist*).tw                                                                       | 112     |
|                 | CLS.tw                                                                                            | 2872    |
|                 | (Certified Child Life Specialist*).tw                                                             | 18      |
|                 | CCLS.tw                                                                                           | 189     |
|                 | (Child Life Therapy).tw                                                                           | 2       |
|                 | CLT.tw                                                                                            | 946     |
|                 |                                                                                                   |         |
| 17              | exp mental health/                                                                                | 41208   |
|                 | (mental adj3 health).tw                                                                           | 126910  |
|                 | ((psych* or mental* or emotion* or social* or child*) adj3 (well-being or wellbeing)).tw          | 26435   |
|                 | exp mental disorders/                                                                             | 1265669 |
|                 | ((psych* or mental* or depress*) adj3 (disease* or disorder* or ill* or disturb* or symptom*)).tw | 276660  |
|                 | exp Affective Symptoms/                                                                           | 13154   |
|                 | Affective*.tw                                                                                     | 50720   |
|                 | exp Mood Disorders/                                                                               | 123959  |
|                 | (mood disorder*).tw                                                                               | 14789   |
|                 | exp Anxiety/                                                                                      | 88624   |
|                 | exp anxiety disorders/                                                                            | 80583   |
|                 | ((stress* or anxiet*) adj3 disorder*).tw                                                          | 59714   |
|                 | (anxiet* or anxious).tw                                                                           | 173606  |
|                 | exp Fear/                                                                                         | 33948   |

|               |                                                                        |                |
|---------------|------------------------------------------------------------------------|----------------|
|               | Fear*.tw                                                               | 71894          |
|               | exp Pain/                                                              | 403578         |
|               | Pain.tw                                                                | 538311         |
|               | exp stress, psychological/                                             | 135106         |
|               | (stress* adj3 (psych* or mental* or emotion* or famil* or parent*)).tw | 39350          |
|               | exp psychological distress/                                            | 1265           |
|               | ((psych* or emotion*) adj3 (distress* or tension)).tw                  | 27000          |
|               |                                                                        |                |
| 38            | (Randomi* control* trial*).tw                                          | 160661         |
|               | RCT.tw                                                                 | 18180          |
|               |                                                                        |                |
| 40            | or/ 1-10                                                               | 4093130        |
| 41            | or/ 11-16                                                              | 4089           |
| 42            | or/ 17-37                                                              | 2302801        |
| 43            | or/ 38-39                                                              | 166870         |
| 44            | English.lg                                                             | 22783057       |
| 45            | German.lg                                                              | 863700         |
| 46            | or/ 44-45                                                              | 23642348       |
| 47            | 40 and 41 and 42 and 43 and 46                                         | 7              |
| <b>Embase</b> |                                                                        |                |
| <b>#</b>      | <b>Searches</b>                                                        | <b>Results</b> |
| 1             | exp Infant/                                                            | 849932         |
|               | Infant*.tw                                                             | 406710         |
|               | exp Child/                                                             | 2309411        |
|               | child*.tw                                                              | 1601973        |
|               | exp adolescent/                                                        | 1416849        |
|               | adolescent*.tw                                                         | 324906         |
|               | teen*.tw                                                               | 39756          |
|               | minor*.tw                                                              | 360582         |
|               | (baby or babies).tw                                                    | 89289          |
|               | toddler*.tw                                                            | 14613          |
|               |                                                                        |                |
| 11            | (Child Life Specialist*).tw                                            | 363            |
|               | CLS.tw                                                                 | 4849           |
|               | (Certified Child Life Specialist*).tw                                  | 52             |
|               | CCLS.tw                                                                | 348            |
|               | (Child Life Therapy).tw                                                | 9              |
|               | CLT.tw                                                                 | 1500           |
|               |                                                                        |                |

|                     |                                                                                                                          |                           |
|---------------------|--------------------------------------------------------------------------------------------------------------------------|---------------------------|
| 17                  | exp mental health/<br>(mental adj3 health).tw                                                                            | 162193<br>191514          |
|                     | ((psych* or mental* or emotion* or social* or child*) adj3 (well-being or wellbeing)).tw                                 | 43739                     |
|                     | exp mental disease/<br>((psych* or mental* or depress*) adj3 (disease* or disorder* or ill* or disturb* or symptom*)).tw | 2066636<br>425087         |
|                     | exp emotional disorder/<br>Affective*.tw                                                                                 | 15490<br>69862            |
|                     | exp Mood Disorders/<br>(mood disorder*).tw                                                                               | 507293<br>26849           |
|                     | exp Anxiety/<br>exp anxiety disorders/<br>((stress* or anxiet*) adj3 disorder*).tw                                       | 207041<br>246829<br>95460 |
|                     | (anxiet* or anxious).tw                                                                                                  | 286624                    |
|                     | exp Fear/<br>Fear*.tw                                                                                                    | 257738<br>109878          |
|                     | exp Pain/<br>Pain.tw                                                                                                     | 1307487<br>911305         |
|                     | exp mental stress/<br>(stress* adj3 (psych* or mental* or emotion* or famil* or parent*)).tw                             | 78090<br>58257            |
|                     | exp distress syndrome/<br>((psych* or emotion*) adj3 (distress* or tension)).tw                                          | 46739<br>42194            |
|                     |                                                                                                                          |                           |
| 38                  | (Randomi* control* trial*).tw                                                                                            | 260671                    |
|                     | RCT.tw                                                                                                                   | 40403                     |
|                     |                                                                                                                          |                           |
| 40                  | or/ 1-10                                                                                                                 | 3821589                   |
| 41                  | or/ 11-16                                                                                                                | 6980                      |
| 42                  | or/ 17-37                                                                                                                | 3813274                   |
| 43                  | or/ 38-39                                                                                                                | 278232                    |
| 44                  | English.lg                                                                                                               | 27349719                  |
| 45                  | German.lg                                                                                                                | 579965                    |
| 46                  | or/44-45                                                                                                                 | 27891055                  |
| 47                  | 40 and 41 and 42 and 43 and 46                                                                                           | 13                        |
| <b>APA PsycINFO</b> |                                                                                                                          |                           |
| <b>#</b>            | <b>Searches</b>                                                                                                          | <b>Results</b>            |
| 1                   | TI Infant* OR AB Infant*                                                                                                 | 56750                     |

|    |                                                                                                                                                                                                      |        |
|----|------------------------------------------------------------------------------------------------------------------------------------------------------------------------------------------------------|--------|
|    | TI child* OR AB child*                                                                                                                                                                               | 453693 |
|    | TI adolescent* OR AB adolescent*                                                                                                                                                                     | 148545 |
|    | TI teen* OR AB teen*                                                                                                                                                                                 | 14932  |
|    | TI minor* OR AB minor*                                                                                                                                                                               | 56595  |
|    | TI (baby or babies) OR AB (baby or babies)                                                                                                                                                           | 11157  |
|    | TI toddler* OR AB toddler                                                                                                                                                                            | 6481   |
| 8  | S1 OR S2 OR S3 OR S4 OR S5 OR S6 OR S7                                                                                                                                                               | 631685 |
|    |                                                                                                                                                                                                      |        |
| 9  | TI (Child Life Specialist*) OR AB (Child Life Specialist*)                                                                                                                                           | 55     |
|    | TI CLS OR AB CLS                                                                                                                                                                                     | 305    |
|    | TI (Certified Child Life Specialist*) OR AB (Certified Child Life Specialist*)                                                                                                                       | 7      |
|    | TI CCLS OR AB CCLS                                                                                                                                                                                   | 108    |
|    | TI (Child Life Therapy) OR AB (Child Life Therapy)                                                                                                                                                   | 82     |
|    | TI CLT OR AB CLT                                                                                                                                                                                     | 262    |
| 15 | S9 OR S10 OR S11 OR S12 OR S13 OR S14                                                                                                                                                                | 803    |
|    |                                                                                                                                                                                                      |        |
| 16 | TI (mental health) OR AB (mental health)                                                                                                                                                             | 132932 |
|    | TI ((psych* or mental* or emotion* or social* or child*) and (well-being or wellbeing)) OR AB ((psych* or mental* or emotion* or social* or child*) and (well-being or wellbeing))                   | 52552  |
|    | TI (mental disorder*) OR AB (mental disorder*)                                                                                                                                                       | 45840  |
|    | TI ((psych* or mental* or depress*) and (disease* or disorder* or ill* or disturb* or symptom*)) OR AB ((psych* or mental* or depress*) and (disease* or disorder* or ill* or disturb* or symptom*)) | 434552 |
|    | TI (affective*) OR AB (affective*)                                                                                                                                                                   | 64811  |
|    | TI (mood disorder*) OR AB (mood disorder*)                                                                                                                                                           | 16807  |
|    | TI (anxiet* or anxious) OR AB (anxiet* or anxious)                                                                                                                                                   | 149598 |
|    | TI (anxiety disorder*) OR AB (anxiety disorder*)                                                                                                                                                     | 34922  |
|    | TI ((stress* or anxiet*) and disorder*) OR AB ((stress* or anxiet*) and disorder*)                                                                                                                   | 91579  |
|    | TI (fear*) OR AB (fear*)                                                                                                                                                                             | 57473  |

|    |                                                                                                                                                |         |
|----|------------------------------------------------------------------------------------------------------------------------------------------------|---------|
|    | TI (pain*) OR AB (pain*)                                                                                                                       | 85185   |
|    | TI (stress* and (psych* or mental* or emotion* or famil* or parent*)) OR AB (stress* and (psych* or mental* or emotion* or famil* or parent*)) | 105086  |
|    | TI ((psych* or emotion*) and (stress or distress* or tension)) OR AB ((psych* or emotion*) and (stress or distress* or tension))               | 103263  |
| 29 | S16 OR S17 OR S18 OR S19 OR S20 OR S21 OR S22 OR S23 OR S24 OR S25 OR S26 OR S27 OR S28                                                        | 800515  |
|    |                                                                                                                                                |         |
| 30 | TI (Randomi* control* trial*) OR AB (Randomi* control* trial*)                                                                                 | 39228   |
|    | TI RCT OR AB RCT                                                                                                                               | 7178    |
| 32 | S30 OR S31                                                                                                                                     | 41183   |
|    |                                                                                                                                                |         |
| 33 | LA English                                                                                                                                     | 3308606 |
| 34 | LA German                                                                                                                                      | 27182   |
| 35 | S33 OR S34                                                                                                                                     | 3308610 |
| 36 | S8 AND S15 AND S29 AND S32 AND S35                                                                                                             | 5       |

*Anmerkungen.* Die Literatursuche wurde im Zuge des Reviewprozesses aktualisiert. Obwohl die Gesamttrefferzahl zunahm, konnte keine weitere Studie in die vorliegende Übersichtsarbeit eingeschlossen werden.
